# Supplementary material for: Non-triggered sequential-release liposomes enhance anti-breast cancer efficacy of STS and celastrol-based microemulsion
Source: Royal Society of Chemistry journal article supplement (doi:10.1039/c8bm00796a), 2018-01-01
Supplement: c8bm00796a1.pdf [file c8bm00796a1.pdf]

## Supplementary Information

### **Non-triggered sequentially-released liposomes enhance anti-breast cancer efficacy of STS and celastrol-based microemulsion**

Ding Qu<sup>a,b</sup>, Lixiang Wang<sup>a</sup>, Yue Qin<sup>b</sup>, Mengfei Guo<sup>a</sup>, Jian Guo<sup>a</sup>, Mengmeng Huang<sup>a,b</sup>,

Yuping Liu<sup>a,b</sup>, Congyan Liu<sup>a,b</sup>, Hui Li<sup>c</sup>, Yan Chen<sup>a,b,\*</sup>

<sup>a</sup>*Affiliated Hospital of Integrated Traditional Chinese and Western Medicine, Nanjing University of Chinese Medicine, Nanjing 210028, China*

<sup>b</sup>*Jiangsu Provincial Academy of Traditional Chinese Medicine, Nanjing 210028, China*

<sup>c</sup>*Institute of Chinese Materia Medica, China Academy of Chinese Medical Sciences, Beijing 100010, China*

\*Corresponding author. Tel.: +86 25 52362155; Email: ychen202@hotmail.com (Y. Chen)

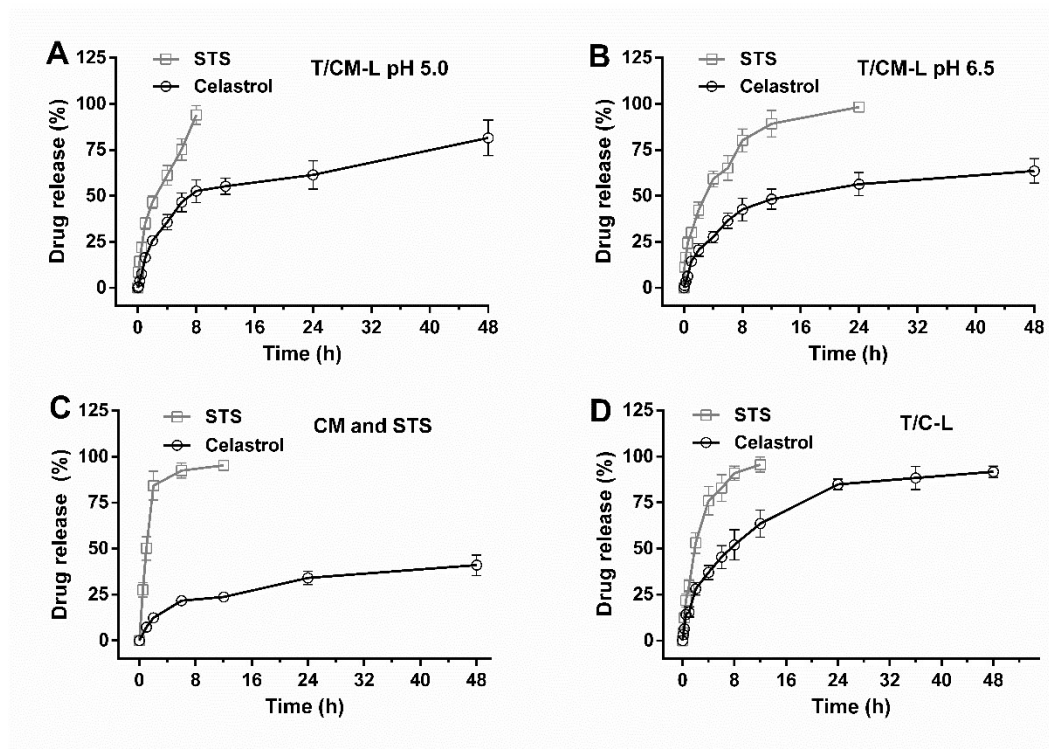

Fig. S1. *In vitro* accumulative drug release of T/CM-L at (A) pH 5.0 and (B) pH 6.5, (C) CM and STS and (D) T/C-L under PBS of pH 7.4 within 48 h. Data are represented as mean  $\pm$  SD; n = 3.

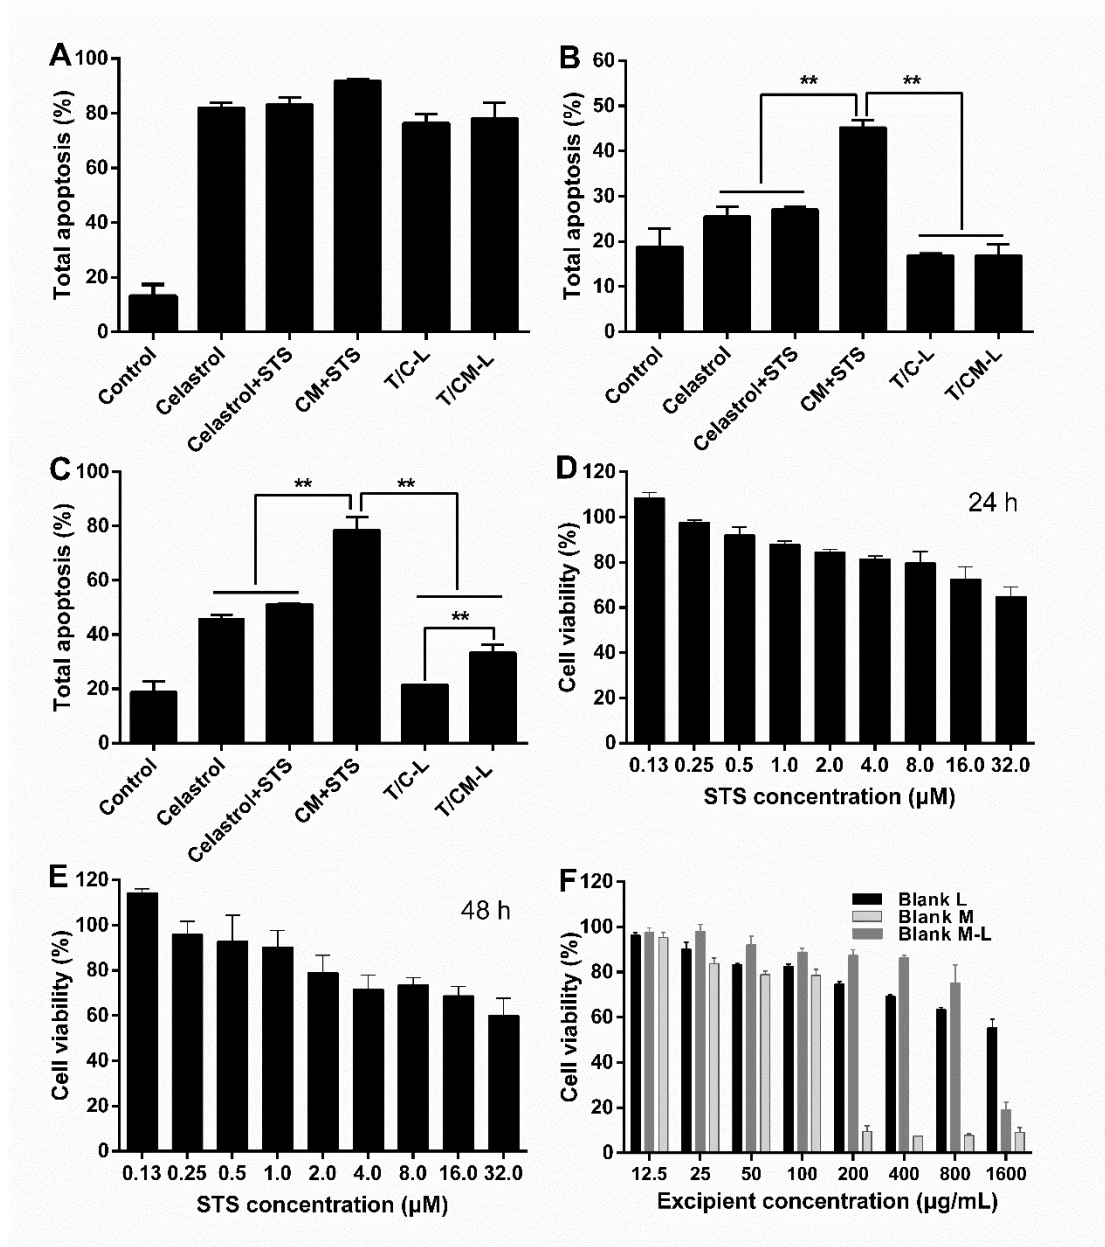

Fig. S2. Cell apoptosis and cytotoxicity. (A) Quantification of apoptosis ratio on MCF-7 cells treated with different formulations at a celastrol concentration of 2.5  $\mu\text{g/mL}$  for 10 h. Quantification of apoptosis ratio on MCF-7 cells treated with different formulations at a celastrol concentration of (B) 0.5  $\mu\text{g/mL}$  and (C) 1.0  $\mu\text{g/mL}$  for 5 h. Data are represented as mean  $\pm$  SD;  $n = 3$ .  $**P < 0.01$ . Cytotoxicity of STS against MCF-7 cells for (D) 24 h and (E) 48 h. Data are represented as mean  $\pm$  SD;  $n = 6$ . (F) Antiproliferative effect of blank carrier toward L-02 cells for 48 h. Data are represented as mean  $\pm$  SD;  $n = 6$ .

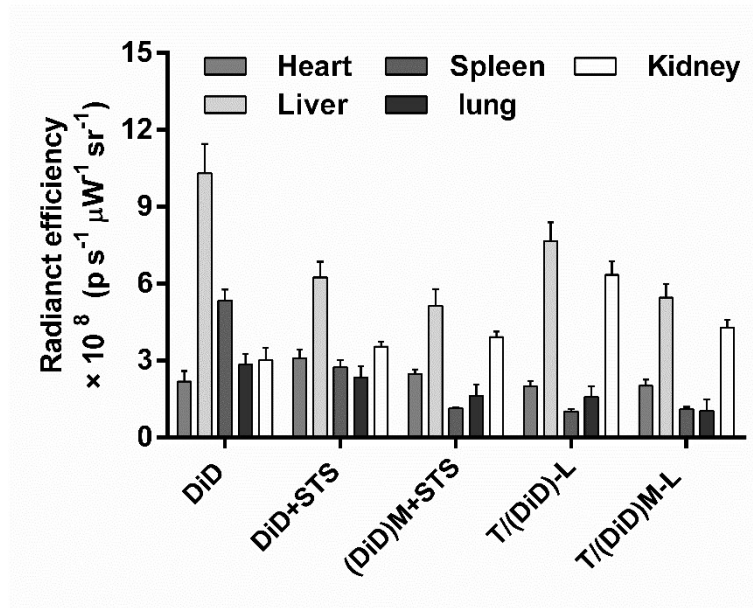

Fig. S3. Quantification of distribution of fluorescence in main normal organs after 24 h of the administration. Data are represented as mean  $\pm$  SD; n = 3.

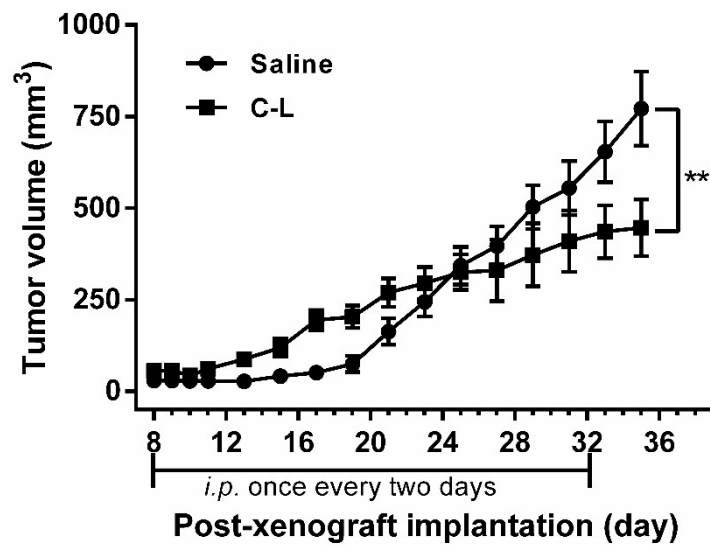

Fig. S4. Curve of the tumor growth of mice treated with C-L during the observation period. Data are represented as mean  $\pm$  SD; n = 6. \*\* $P$  < 0.01.

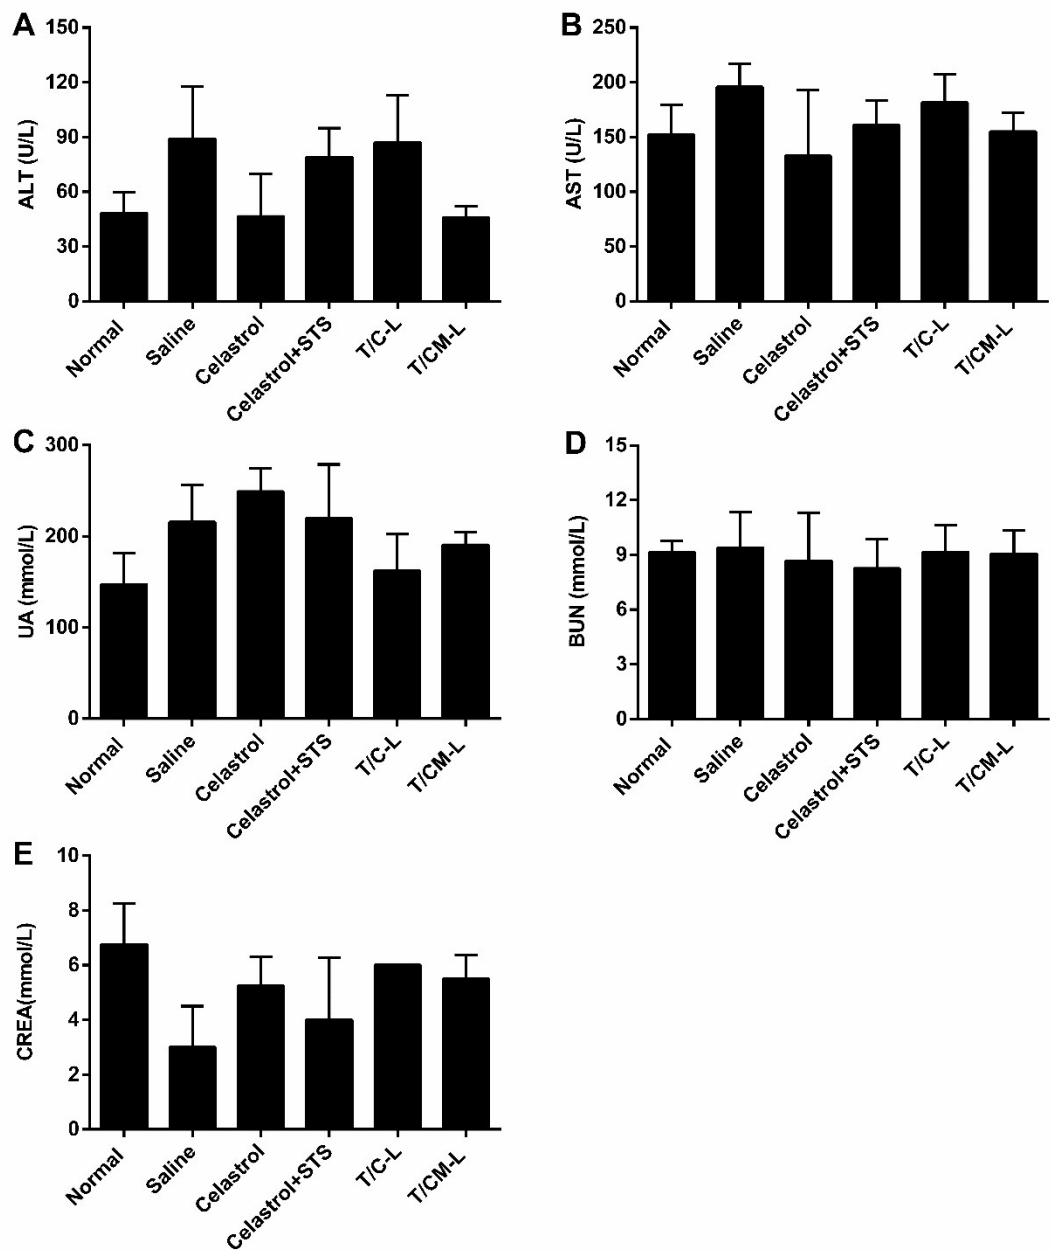

Fig. S5. Evaluation on the liver and kidney function. Serum level of (A) ALT, (B) AST, (C) UA, (D) BUN and (E) CREA of mice after 24 h of the last administration. Data are represented as mean  $\pm$  SD; n = 6.
